# Supplementary material
Source: PubMed Central journal article supplement (PMC3661006)
Supplement: NIHMS459514-supplement-2.pdf [file NIHMS459514-supplement-2.pdf]

## **Supplemental Material**

Identification of a Genetic Locus on Chromosome 11 that Regulates Leukocyte Infiltration in Mouse Carotid Artery

Elaine M. Smolock<sup>1</sup>, Dietrich E. Machleder<sup>1</sup>, Vyacheslav A. Korshunov<sup>1</sup> and Bradford C. Berk<sup>1\*</sup>

<sup>1</sup>From the Aab Cardiovascular Research Institute and Department of Medicine, University of Rochester School of Medicine and Dentistry, Rochester, NY USA

\*To whom correspondence should be addressed:

Bradford C. Berk, MD, PhD  
University of Rochester  
Aab Cardiovascular Research Institute,  
601 Elmwood Ave, Box 679  
Rochester, NY 14642  
Phone: 585-273-1946  
Fax: 585-273-1497  
Email: Bradford\_Berk@urmc.rochester.edu

**Running title:** Genetics of Leukocyte infiltration in Mouse Carotid

**Supplemental Table SI.** List of SNPs differing between C3H/F and SJL mice in the chr11 *Im2* locus

| Gene symbol   | Name / description                                                                            | Chromosome location         |
|---------------|-----------------------------------------------------------------------------------------------|-----------------------------|
| 1700007J10Rik | RIKEN cDNA 1700007J10 gene                                                                    | 11:59539419-59553656        |
| 1700008A04Rik | RIKEN cDNA 1700008A04 gene                                                                    | 11:32718529-32724605        |
| 1810063I02Rik | RIKEN cDNA 1810063I02 gene                                                                    | 11:59735001-59735391        |
| 3010026O09Rik | RIKEN cDNA 3010026O09 gene                                                                    | 11:49987946-50013617        |
| 4930403D09Rik | RIKEN cDNA 4930403D09 gene                                                                    | 11:34199707-34208113        |
| 4930469K13Rik | RIKEN cDNA 4930469K13 gene                                                                    | 11:33873961-33998554        |
| 4930505A04Rik | RIKEN cDNA 4930505A04 gene                                                                    | 11:30326006-30371827        |
| 4930555O08Rik | RIKEN cDNA 4930555O08 gene                                                                    | 11:32689762-32690725        |
| 4933406G16Rik | RIKEN cDNA 4933406G16 gene                                                                    | 11:18965279-18975743        |
| 4933424L21Rik | RIKEN cDNA 4933424L21 gene                                                                    | 11:57437200-57462996        |
| 4933427E13Rik | RIKEN cDNA 4933427E13 gene                                                                    | 11:25226107-25267137        |
| 4933430M04Rik | RIKEN cDNA 4933430M04 gene                                                                    | 11:24381909-24469952        |
| 5133400J02Rik | RIKEN cDNA 5133400J02 gene                                                                    | 11:51003335-51033920        |
| 8430419K02Rik | RIKEN cDNA 8430419K02 gene                                                                    | 11:18745854-18774312        |
| A230004M16Rik | RIKEN cDNA A230004M16 gene                                                                    | 11:41523844-41786619        |
| Acyp2         | acylphosphatase 2, muscle type                                                                | 11:30405991-30549587        |
| Adams2        | a disintegrin-like and metallopeptidase (reprolysin type) with thrombospondin type 1 motif, 2 | 11:50415586-50621075        |
| Adra1b        | adrenergic receptor, alpha 1b                                                                 | 11:43588108-43714712        |
| Aff4          | AF4/FMR2 family, member 4                                                                     | 11:53164335-53235332        |
| Aftph         | aftphilin                                                                                     | 11:20585087-20641592        |
| Asb3          | ankyrin repeat and SOCS box-containing 3                                                      | 11:30854395-31002704        |
| Atp10b        | ATPase, class V, type 10B                                                                     | 11:42963379-43075787        |
| BC049762      | cDNA sequence BC049762                                                                        | 11:51067153-51076548        |
| Bc111a        | B cell CLL/lymphoma 11A (zinc finger protein)                                                 | 11:23978056-24074123        |
| Btnl9         | butyrophilin-like 9                                                                           | 11:48979087-49000661        |
| Clqtnf2       | Clq and tumor necrosis factor related protein 2                                               | 11:43287778-43305027        |
| Canx          | calnexin                                                                                      | 11:50107969-50139175        |
| Ccdc85a       | coiled-coil domain containing 85A                                                             | 11:28285685-28484324        |
| Ccdc88a       | coiled coil domain containing 88A                                                             | 11:29273658-29410808        |
| Ccdc99        | coiled-coil domain containing 99                                                              | 11:34622692-34647143        |
| Ccnj1         | cyclin J-like                                                                                 | 11:43342286-43400499        |
| Cdk13         | cyclin-dependent kinase-like 3                                                                | 11:51817723-51903286        |
| Cdkn2aipnl    | CDKN2A interacting protein N-terminal like                                                    | 11:51781163-51790836        |
| Chac2         | ChaC, cation transport regulator 2                                                            | 11:30876707-30886350        |
| Clint1        | clathrin interactor 1                                                                         | 11:45665553-45724127        |
| Clk4          | CDC like kinase 4                                                                             | 11:51075232-51095268        |
| Col23a1       | collagen, type XXIII, alpha 1                                                                 | 11:51103422-51397420        |
| Cops3         | COP9 (constitutive photomorphogenic) homolog, subunit 3 (Arabidopsis thaliana)                | 11:59631297-59653340        |
| Cyfp2         | cytoplasmic FMR1 interacting protein 2                                                        | 11:46007357-46125796        |
| D930048N14Rik | RIKEN cDNA D930048N14 gene                                                                    | 11:51464456-51471183        |
| Dock2         | dedicator of cyto-kinesis 2                                                                   | 11:34126815-34597394        |
| Ebfl          | early B cell factor 1                                                                         | 11:44430819-44821593        |
| <b>Efemp1</b> | <b>epidermal growth factor-containing fibulin-like extracellular matrix protein 1</b>         | <b>11:28753204-28826743</b> |
| Eml6          | echinoderm microtubule associated protein like 6                                              | 11:29643048-29926033        |
| F630206G17Rik | RIKEN cDNA F630206G17 gene                                                                    | 11:45621589-45654673        |
| Fam114a2      | family with sequence similarity 114, member A2                                                | 11:57296495-57332119        |
| Fam196b       | family with sequence similarity 196, member B                                                 | 11:34214822-34322640        |
| Fanc1         | Fanconi anemia, complementation group L                                                       | 11:26286135-26371876        |
| Fbxw11        | F-box and WD-40 domain protein 11                                                             | 11:32542724-32646789        |
| Fstl4         | follistatin-like 4                                                                            | 11:52578136-53002040        |
| Gabra1        | gamma-aminobutyric acid (GABA) A receptor, subunit alpha 1                                    | 11:41944441-41996432        |
| Gabra6        | gamma-aminobutyric acid (GABA) A receptor, subunit alpha 6                                    | 11:42119939-42134574        |
| Gabrb2        | gamma-aminobutyric acid (GABA) A receptor, subunit beta 2                                     | 11:42233259-42442530        |
| Gabrg2        | gamma-aminobutyric acid (GABA) A receptor, subunit gamma 2                                    | 11:41723705-41814359        |
| Galnt10       | UDP-N-acetyl-alpha-D-galactosamine:polypeptide N-acetylglucosaminyltransferase 10             | 11:57458944-57601016        |
| Gm12021       | predicted gene 12021                                                                          | 11:18408040-18409943        |
| Gm12022       | predicted gene 12022                                                                          | 11:18367482-18393258        |
| Gm12023       | predicted gene 12023                                                                          | 11:18495251-18610225        |
| Gm12068       | predicted gene 12068                                                                          | 11:24326246-24622646        |
| Gm12069       | predicted gene 12069                                                                          | 11:25201263-25222786        |
| Gm12082       | predicted gene 12082                                                                          | 11:28651633-28715767        |
| Gm12092       | predicted gene 12092                                                                          | 11:29512324-29545509        |
| Gm12093       | predicted gene 12093                                                                          | 11:29588241-29589835        |
| Gm12100       | predicted gene 12100                                                                          | 11:30650832-30656147        |
| Gm12111       | predicted gene 12111                                                                          | 11:32803137-32826160        |

| Gene symbol  | Name / description                                                                              | Chromosome location         |
|--------------|-------------------------------------------------------------------------------------------------|-----------------------------|
| Gm12128      | predicted gene 12128                                                                            | 11:37472491-37486668        |
| Gm12130      | predicted gene 12130                                                                            | 11:38306832-38333515        |
| Gm12132      | predicted gene 12132                                                                            | 11:39821696-40151333        |
| Gm12146      | predicted gene 12146                                                                            | 11:43010926-43073286        |
| Gm12147      | predicted gene 12147                                                                            | 11:43073293-43124590        |
| Gm12153      | predicted gene 12153                                                                            | 11:43772591-43948489        |
| Gm12160      | predicted gene 12160                                                                            | 11:44974445-45027158        |
| Gm12162      | predicted gene 12162                                                                            | 11:45222544-45282006        |
| Gm12665      | predicted gene 12665                                                                            | 11:24803983-24826058        |
| Gm12714      | predicted gene 12714                                                                            | 11:59711876-59720821        |
| Gm16641      | predicted gene, 16641                                                                           | 11:50050511-50102341        |
| Gm16953      | predicted gene, 16953                                                                           | 11:51763384-52083016        |
| Gm8098       | predicted gene 8098                                                                             | 11:30167464-30180491        |
| Gm9972       | predicted gene 9972                                                                             | 11:42849248-42850780        |
| Gnb211       | guanine nucleotide binding protein (G protein), beta polypeptide 2 like 1                       | 11:48613834-48619936        |
| Gria1        | glutamate receptor, ionotropic, AMPA1 (alpha 1)                                                 | 11:56824889-57143746        |
| Hmmr         | hyaluronan mediated motility receptor (RHAMM)                                                   | 11:40514897-40546924        |
| Il12b        | interleukin 12b                                                                                 | 11:44213565-44227535        |
| Kcnip1       | Kv channel-interacting protein 1                                                                | 11:33529339-33893152        |
| Kif3a        | kinesin family member 3A                                                                        | 11:53380881-53415469        |
| Lsm11        | U7 snRNP-specific Sm-like protein LSM11                                                         | 11:45741771-45758437        |
| Maml1        | mastermind like 1 (Drosophila)                                                                  | 11:50069136-50105813        |
| Mat2b        | methionine adenosyltransferase II, beta                                                         | 11:40492816-40508705        |
| Med9         | mediator of RNA polymerase II transcription, subunit 9 homolog (yeast)                          | 11:59761708-59775707        |
| Meis1        | Meis homeobox 1                                                                                 | 11:18780433-18918961        |
| Mfap3        | microfibrillar-associated protein 3                                                             | 11:57332166-57347317        |
| Mgat1        | mannoside acetylglucosaminyltransferase 1                                                       | 11:49057748-49076532        |
| Mprp         | myosin phosphatase Rho interacting protein                                                      | 11:59474807-59594356        |
| Mtif2        | mitochondrial translational initiation factor 2                                                 | 11:29426408-29445279        |
| Nhp2         | NHP2 ribonucleoprotein homolog (yeast)                                                          | 11:51433237-51437216        |
| Nlrp3        | NLR family, pyrin domain containing 3                                                           | 11:59355070-59380457        |
| Nt5m         | 5',3'-nucleotidase, mitochondrial                                                               | 11:59652949-59694470        |
| Olf156       | olfactory receptor 56                                                                           | 11:48864235-48948889        |
| P4ha2        | procollagen-proline, 2-oxoglutarate 4-dioxygenase (proline 4-hydroxylase), alpha II polypeptide | 11:53913597-53945167        |
| Pemt         | phosphatidylethanolamine N-methyltransferase                                                    | 11:59784116-59859991        |
| <b>Pnpt1</b> | <b>polynucleotide nucleotidyltransferase 1</b>                                                  | <b>11:29030744-29061828</b> |
| Ppp3r1       | protein phosphatase 3, regulatory subunit B, alpha isoform (calcineurin B, type I)              | 11:17059266-17100378        |
| Psme4        | proteasome (prosome, macropain) activator subunit 4                                             | 11:30671726-30780361        |
| Pttg1        | pituitary tumor-transforming gene 1                                                             | 11:43233752-43239753        |
| Rad50        | RAD50 homolog (S. cerevisiae)                                                                   | 11:53463021-53520821        |
| Rai1         | retinoic acid induced 1                                                                         | 11:59918515-60012699        |
| Ranbp17      | RAN binding protein 17                                                                          | 11:33111795-33413746        |
| Rars         | arginyl-tRNA synthetase                                                                         | 11:35621883-35648008        |
| Rmnd5b       | required for meiotic nuclear division 5 homolog B (S. cerevisiae)                               | 11:51437173-51449398        |
| Rnf145       | ring finger protein 145                                                                         | 11:44332466-44379022        |
| Rtn4         | reticulon 4                                                                                     | 11:29592947-29644331        |
| Sar1b        | SAR1 gene homolog B (S. cerevisiae)                                                             | 11:51577189-51605427        |
| Sec24a       | Sec24 related gene family, member A (S. cerevisiae)                                             | 11:51505766-51577136        |
| Sgcd         | sarcoglycan, delta (dystrophin-associated glycoprotein)                                         | 11:46709755-47802471        |
| Sh3pxd2b     | SH3 and PX domains 2B                                                                           | 11:32247820-32328173        |
| Slit3        | slit homolog 3 (Drosophila)                                                                     | 11:34934726-35522009        |
| Slu7         | SLU7 splicing factor homolog (S. cerevisiae)                                                    | 11:43247246-43261483        |
| Smek2        | SMEK homolog 2, suppressor of mek1 (Dictyostelium)                                              | 11:29072890-29120797        |
| Snap47       | synaptosomal-associated protein, 47                                                             | 11:59220636-59264688        |
| Spnb2        | spectrin beta 2                                                                                 | 11:29999395-30168175        |
| Spred2       | sprouty-related, EVH1 domain containing 2                                                       | 11:19824378-19924029        |
| Sqstm1       | sequestosome 1                                                                                  | 11:50012868-50024329        |
| Stc2         | stanniocalcin 2                                                                                 | 11:31257307-31270074        |
| Stk10        | serine/threonine kinase 10                                                                      | 11:32433305-32524587        |
| Tcf7         | transcription factor 7, T cell specific                                                         | 11:52065873-52096516        |
| Trim41       | tripartite motif-containing 41                                                                  | 11:48619906-48630855        |
| Ube2b        | ubiquitin-conjugating enzyme E2B                                                                | 11:51798999-51814264        |
| Uqcrcq       | ubiquinol-cytochrome c reductase, complex III subunit VII                                       | 11:53241424-53244333        |
| Vrk2         | vaccinia related kinase 2                                                                       | 11:26371322-26493999        |
| Wdr92        | WD repeat domain 92                                                                             | 11:17082110-17133799        |
| Wnt3a        | wingless-related MMTV integration site 3A                                                       | 11:59061535-59104254        |
| Wnt9a        | wingless-type MMTV integration site 9A                                                          | 11:59120430-59147054        |
| Wwcl         | WW, C2 and coiled-coil domain containing 1                                                      | 11:35651902-35794029        |

| <b>Gene symbol</b> | <b>Name / description</b>                 | <b>Chromosome location</b> |
|--------------------|-------------------------------------------|----------------------------|
| Zfp62              | zinc finger protein 62                    | 11:49016794-49032318       |
| Zfp672             | zinc finger protein 672                   | 11:58128626-58136825       |
| Zfp867             | zinc finger protein 867                   | 11:59274699-59285976       |
| Zkscan17           | zinc finger with KRAB and SCAN domains 17 | 11:59299022-59340253       |

## Supplemental Figure Legends

**Supplemental Figure SI. CD45<sup>+</sup> expression normalized to  $\alpha_1$ -actin<sup>+</sup> in the C3H/FxSJL backcross. A.** Relative CD45<sup>+</sup> normalized to  $\alpha_1$ -actin<sup>+</sup> expression in the vascular wall of C3H/F, F1 and N2 progeny and SJL mice 14 days after injury. CD45<sup>+</sup> expression in the N2 progeny exhibited an intermediate phenotype.

**Supplemental Figure SII. Quantitative trait linkage analysis for CD45<sup>+</sup> expression normalized to  $\alpha_1$ -actin<sup>+</sup>. A.** All N2 progeny were used for QTL analysis of the ration of CD45<sup>+</sup>/ $\alpha_1$ -actin<sup>+</sup> expression. A nearly significant QTL was found on chr11 (LOD 2.3). A nearly suggestive QTL was identified on chr9 (LOD 1.4).

**Supplemental Figure SIII. *Im2* congenic mice and morphometric analysis. A-C.** Lumen, intima+media, and external elastic lamina (EEL) were quantified in parental and congenic mice 14 days following partial carotid ligation. There were no significant differences in media (A) intima+media (B) of EEL (C) volumes among the C3H/F and congenic lines.

**Supplemental Figure SIV. CD45<sup>+</sup> expression normalized to  $\alpha_1$ -actin<sup>+</sup> in the congenic mice.** Sections from C3H/F.SJL.11.1 and C3H/F.SJL.11.2 where intima area was observed were stained for CD45<sup>+</sup> and  $\alpha_1$ -actin<sup>+</sup> 14 days after injury. CD45<sup>+</sup> expression normalized to  $\alpha_1$ -actin<sup>+</sup> was increased in C3H/F.SJL.11.1 but not in C3H/F.SJL.11.2 sections compared to C3H/F.

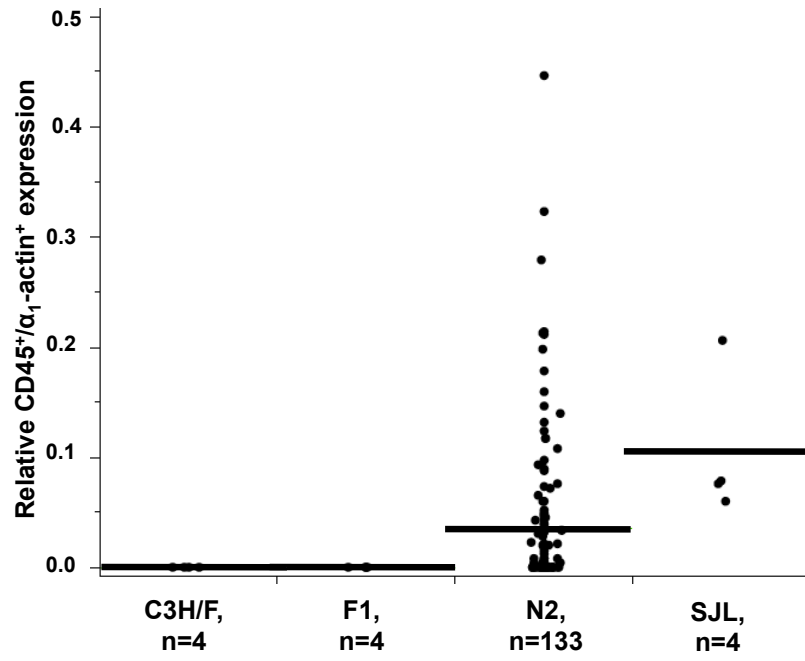

**SUPPLEMENTAL FIGURE S1**

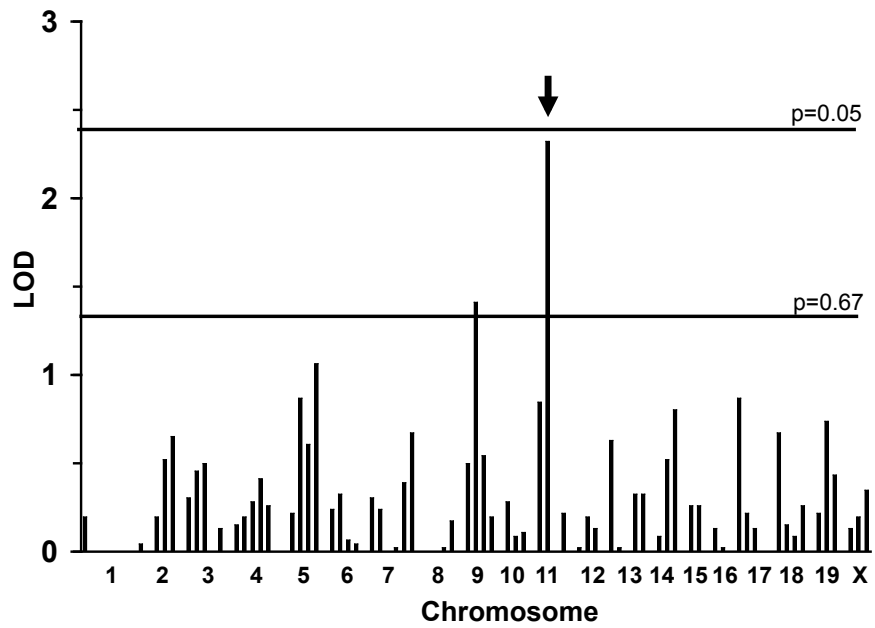

**SUPPLEMENTAL FIGURE SII**

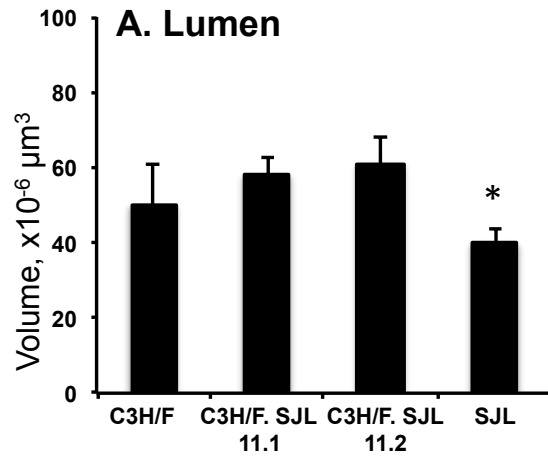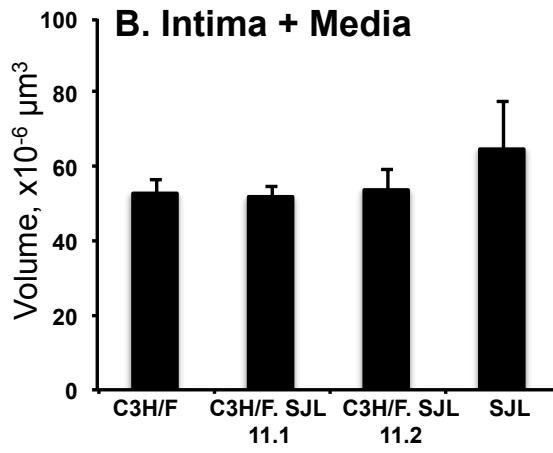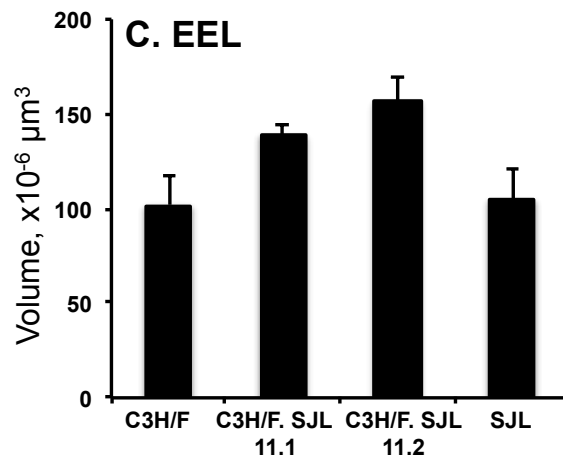

**SUPPLEMENTAL FIGURE SIII**



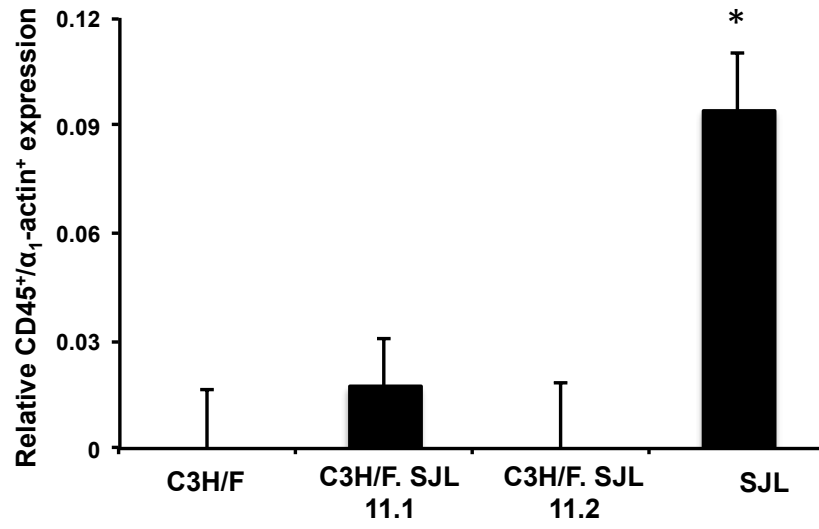

**SUPPLEMENTAL FIGURE SIV**

## References for Materials and Methods

1. Korshunov VA, Berk BC. Genetic modifier loci linked to intima formation induced by low flow in the mouse carotid. *Arterioscler Thromb Vasc Biol.* 2009;29:47-53
2. Lande R, Thompson R. Efficiency of marker-assisted selection in the improvement of quantitative traits. *Genetics.* 1990;124:743-756
3. Korshunov VA, Berk BC. Flow-induced vascular remodeling in the mouse: A model for carotid intima-media thickening. *Arterioscler Thromb Vasc Biol.* 2003;23:2185-2191
4. Lander E, Kruglyak L. Genetic dissection of complex traits: Guidelines for interpreting and reporting linkage results. *Nat Genet.* 1995;11:241-247.
